# Supplementary material for: Whole-Exome Sequencing for the Identification of Susceptibility Genes of Kashin–Beck Disease
Source: PLoS One. 2014 Apr 28;9(4):e92298. doi: 10.1371/journal.pone.0092298 (PMC4002427; doi:10.1371/journal.pone.0092298)
Supplement: Table S2 — KEGG pathway analysis indicates that many genes with significant P value in the test focus on three major pathways. (XLSX) [file pone.0092298.s003.xlsx]

## Sheet: Sheet1
Supplementary Table S2 KEGG pathway analysis indicates that many genes with significant P value in the test focus on three major pathways.
KEGG pathway analysis	Genes
Regulation of actin cytoskeleton	VAV1、VAV3、RAC2、ITGA6、ITGA2B、ITGB3、ITGB1、MYH14、PFN2、SCIN
Metabolic pathways	AMPD2 、PLA2G4A 、GCNT2、PLCZ1、AGPS、ALG12、POLR1A、ETNK2、GALK2、CRLS1、PIK3C2A、DGKH、ALDH5A1、PIK3C2G、PNLIPRP2、KYNU、PYCRL、HK2、RPN2、DPYD、HAO2、HSD3B1、DGKB、AMACR、DNMT1、GLDC、MTHFD1、ALG1
Focal adhesion	VAV3、TNR、COL5A2、COL4A4、ITGA6、LAMA2、ITGA2B、COL6A6、VAV1、RAC2、IGF1R、PRKCB、ITGB3、ITGB1、COL4A1、COL5A3
